# Supplementary material for: Exploration of the interaction strength at the interface of neutral chalcogen ligands and gold surfaces
Source: Royal Society of Chemistry journal article supplement (doi:10.1039/d5ra08118a), 2026-01-01
Supplement: d5ra08118a2.pdf [file d5ra08118a2.pdf]

## Supplementary Information

### Exploration of the Interaction Strength at the Interface of Neutral Chalcogen Ligands and Gold Surfaces

Talia Alexandra Garzón<sup>1</sup>, Monica Calatayud<sup>2</sup>, Mary Tabut<sup>2,3</sup>, Fernando Mendizabal<sup>4\*</sup>,  
María Luisa Cerón<sup>\*1</sup>

<sup>1</sup>Facultad de Ingeniería, Universidad Finis Terrae, Av. Pedro de Valdivia 1509,  
Providencia, Santiago, Chile

<sup>2</sup>Sorbonne Université, CNRS, MONARIS, CNRS-UMR 8233, 4 Place Jussieu, F-75005  
Paris, France

<sup>3</sup>Sorbonne Université, CNRS, Laboratoire de Chimie Théorique, LCT, 4 Place Jussieu,  
F-75005 Paris, France

<sup>4</sup>Departamento de Química, Facultad de Ciencias, Universidad de Chile, Casilla 653,  
Santiago, Chile.

\*Correspondence: [hagua@uchile.cl](mailto:hagua@uchile.cl) (F.M.), [lceron@uft.cl](mailto:lceron@uft.cl) (M.L.C)

|                                                                                                | Au-32 $\bar{1}$ (Clean)                                                            | SH <sub>2</sub> - Au-32 $\bar{1}$                                                  | SeH <sub>2</sub> - Au-32 $\bar{1}$                                                   |
|------------------------------------------------------------------------------------------------|------------------------------------------------------------------------------------|------------------------------------------------------------------------------------|--------------------------------------------------------------------------------------|
| Side view<br> |   |  |   |
| Top view<br>  |  |  |  |
| d(Au-Au)<br>Å                                                                                  | 2.776                                                                              | 2.761                                                                              | 2.768                                                                                |
| $\Delta d$ Å                                                                                   | 0.00                                                                               | 0.015                                                                              | 0.008                                                                                |

**Figure S1.** Side and top views of the clean Au-32 $\bar{1}$  surface and the most stable adsorption geometries obtained for the XH<sub>2</sub> species (X = S, Se). The lower panel reports the average Au–Au distance in the surface layer together with the relaxation  $\Delta d$  relative to the clean slab. Adsorption induces only minimal structural distortion ( $\Delta d \leq 0.02$  Å), indicating that the stepped morphology of Au32 $\bar{1}$  is largely preserved.

|                                                                                                | Au-110 (Clean)                                                                      | TeH <sub>2</sub> -Au110                                                              | TeHCH <sub>3</sub> -Au110                                                             |
|------------------------------------------------------------------------------------------------|-------------------------------------------------------------------------------------|--------------------------------------------------------------------------------------|---------------------------------------------------------------------------------------|
| Side view<br>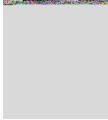  |    |    |    |
| Top view<br> |  |  |  |
| $d_{\text{Au-Au}}$ (Å)                                                                         | 2.830                                                                               | 2.859                                                                                | 2.873                                                                                 |
| $\Delta d$ (Å)                                                                                 | 0.00                                                                                | 0.029                                                                                | 0.043                                                                                 |

**Figure S2.** Side and top views of the clean Au(110) surface and the most stable adsorption geometries obtained for TeH<sub>2</sub> and TeHCH<sub>3</sub>. The lower panel summarizes the average surface Au–Au distances and the corresponding relaxation  $\Delta d$  relative to the clean slab. Adsorption of Te-containing species leads to somewhat larger distortions than those observed for S- and Se-containing adsorbates, with  $\Delta d \approx 0.03\text{--}0.05$  Å, while the characteristic row-like morphology of Au(110) remains essentially unchanged.

|                                                                                               | Au-321 (Clean)                                                                     | SHCH3-Au321                                                                         | SeHCH3-Au321                                                                         |
|-----------------------------------------------------------------------------------------------|------------------------------------------------------------------------------------|-------------------------------------------------------------------------------------|--------------------------------------------------------------------------------------|
| Side view<br> |   |   |   |
| Top view<br> |  |  |  |
| $d_{\text{Au-Au}}$ (Å)                                                                        | 2.775                                                                              | 2.723                                                                               | 2.718                                                                                |
| $\Delta d$ (Å)                                                                                | 0.00                                                                               | 0.052                                                                               | 0.057                                                                                |

**Figure S3.** Side and top views of the clean Au(321) surface and the most stable adsorption geometries obtained for the XHCH<sub>3</sub> species (X = S, Se). The lower panel reports the average Au–Au distance in the topmost layer and the relaxation  $\Delta d$  relative to the clean slab. Adsorption at step-edge Au atoms produces moderate but localized distortions ( $\Delta d \approx 0.05$  Å), consistent with the higher reactivity of high-index stepped facets.

|                                                                                               | SHC6H11-Au-321                                                                     | SeHC6H11-Au321                                                                      | TeHC6H11-Au321                                                                       |
|-----------------------------------------------------------------------------------------------|------------------------------------------------------------------------------------|-------------------------------------------------------------------------------------|--------------------------------------------------------------------------------------|
| Side view<br>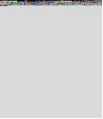 |   |    |   |
| Top view<br>  |  |  |  |
| $d_{\text{Au-Au}}$ (Å)                                                                        | 2.736                                                                              | 2.729                                                                               | 2.733                                                                                |
| $\Delta d$ (Å)                                                                                | 0.039                                                                              | 0.046                                                                               | 0.042                                                                                |

**Figure S4.** Side and top views of the most stable adsorption geometries of the  $\text{XC}_6\text{H}_{11}$  species ( $\text{X} = \text{S}, \text{Se}, \text{Te}$ ) on the  $\text{Au}(321)$  surface. The lower panel displays the average Au–Au distance in the surface layer and the corresponding relaxation  $\Delta d$  relative to the clean slab. The bulkier  $\text{C}_6\text{H}_{11}$  substituent enhances surface relaxation slightly ( $\Delta d \approx 0.04\text{--}0.05$  Å), though the stepped topology of  $\text{Au}(321)$  is maintained.

**Table S1.** Comparison between the total energies and adsorption energies obtained using the  $\text{r}^2\text{SCAN}$  meta-GGA functional (with and without  $\text{rVV10}$  dispersion correction) and those

calculated in this work using the GGA+D3 approach (IVDW=11). Two representative systems

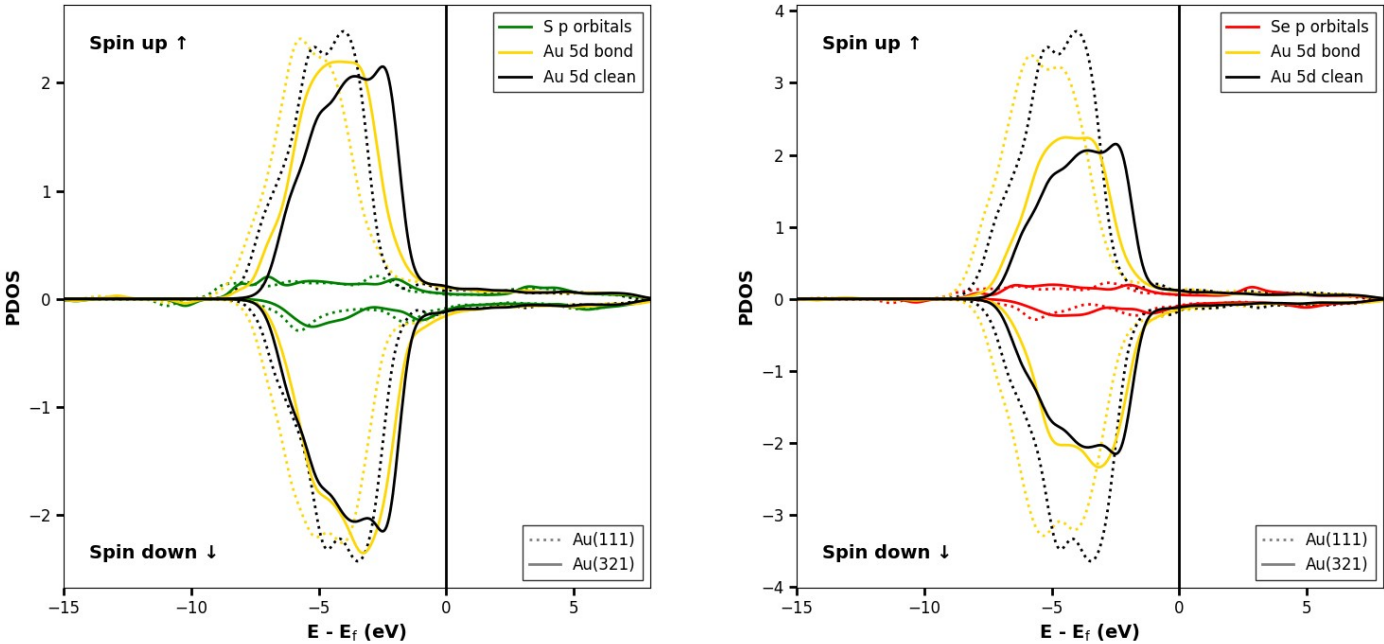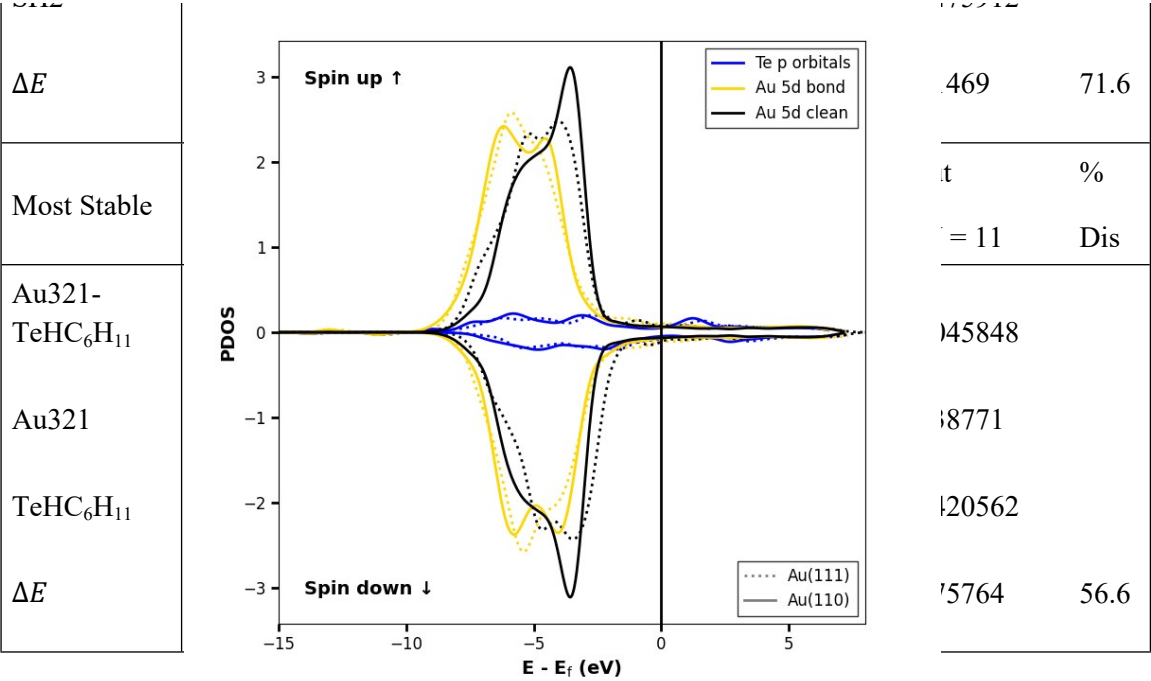

**Figure S5:** Spin-polarized projected density of states (PDOS) for systems  $\text{AuXHCH}_3$  with chalcogen ( $X = \text{S}, \text{Se}, \text{Te}$ ) p-orbitals and gold 5d-orbitals on clean and adsorbed surfaces.

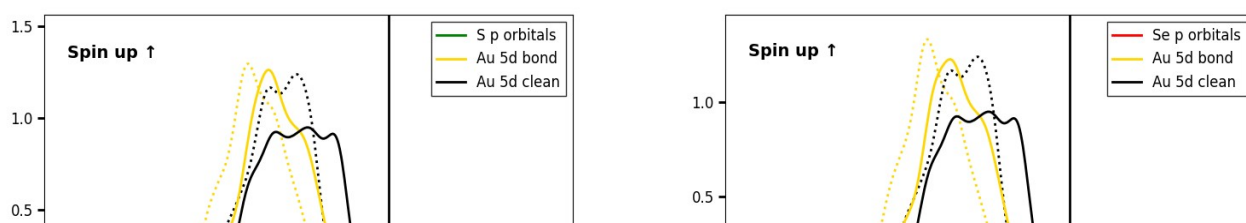

**Figure S6:** Spin-polarized projected density of states (PDOS) for systems  $\text{AuXHC}_6\text{H}_{11}$  with chalcogen ( $X = \text{S, Se, Te}$ ) p-orbitals and gold 5d-orbitals on clean and adsorbed surfaces.
